# Supplementary material
Source: Springer Nature journal article supplement (https://www.springermedizin.de/resource/supplementary/11689_2013_99_MOESM2_ESM.pdf/9673238)

● TD (42) ● 22q11.2DS (32) ● FXS (23) ● TS (31)

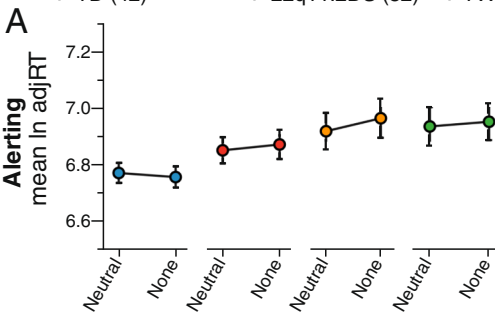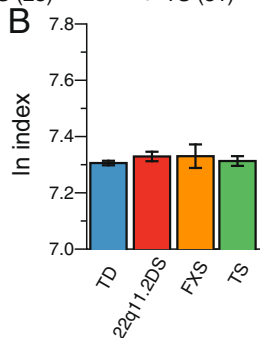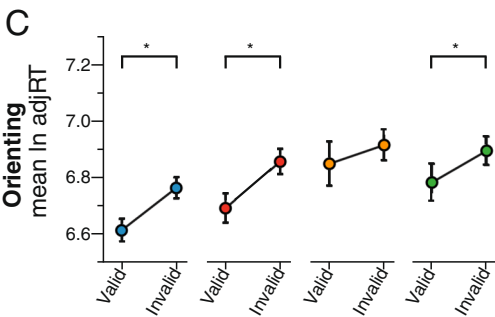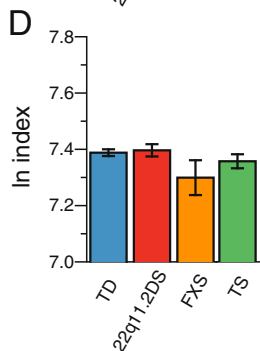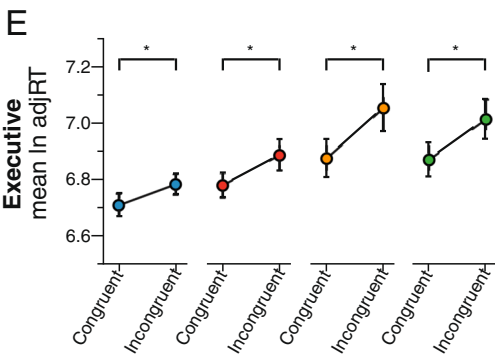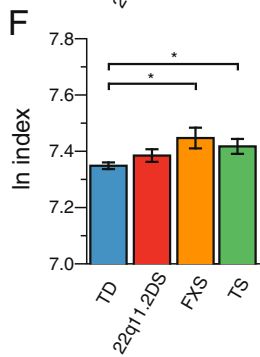

Supplement: MOESM2 [file 9673238]
